# Supplementary material
Source: HighWire-hosted journal article supplement (https://dmd.aspetjournals.org/content/suppl/2015/01/06/dmd.114.062034)
Supplement: DMD62034_supplemental_data.pdf [file DMD62034_supplemental_data.pdf]

**DMD # 62034 - Supplemental Data****Meta-analysis of expression of hepatic organic anion transporting polypeptide (OATP) transporters in cellular systems relative to human liver tissue**

Justine Badée, Brahim Achour, Amin Rostami-Hodjegan and Aleksandra Galetin – Drug Metabolism and Disposition

**TABLE 1**

**Plasma membrane protein expression levels of OATP transporters in human liver tissue, SCHH and human cryopreserved hepatocytes in suspension.** Data represent the mean  $\pm$  S.D. protein expression levels of OATP transporters determined using the plasma membrane fraction.

| OATP1B1                                                         |         | OATP1B3   |         | OATP2B1                |         | No. of samples | Reference               |
|-----------------------------------------------------------------|---------|-----------|---------|------------------------|---------|----------------|-------------------------|
| Mean ± SD                                                       | Max/Min | Mean ± SD | Max/Min | Mean ± SD              | Max/Min |                |                         |
| Human liver tissue (fmol/μg protein)                            |         |           |         |                        |         |                |                         |
| 5.8 ± 3.2 <sup>a</sup>                                          | 3.8     | 1.7 ± 0.5 | 2.6     | 1.7 ± 1.1 <sup>b</sup> | 3.8     | 17             | (Ohtsuki et al., 2012)  |
| Sandwich-cultured human hepatocytes (fmol/μg protein)           |         |           |         |                        |         |                |                         |
| 5.4 ± 1.2                                                       | 1.5     | 4.3 ± 0.3 | 1.1     | 2.9 ± 3.1              | 2.3     | 2              | (Schaefer et al., 2012) |
| Human cryopreserved hepatocytes in suspension (fmol/μg protein) |         |           |         |                        |         |                |                         |
| 15.9                                                            | -       | 0.4       | -       | 1.6                    | -       | 1              | (Kunze et al., 2014)    |

<sup>a</sup> Protein expression levels detected in only 8 out of 17 human liver tissue samples.<sup>b</sup> Protein expression levels detected in only 4 out of 17 human liver tissue samples.

-, Individual data reported

**DMD # 62034 - Supplemental Data****Meta-analysis of expression of hepatic organic anion transporting polypeptide (OATP) transporters in cellular systems relative to human liver tissue**

Justine Badée, Brahim Achour, Amin Rostami-Hodjegan and Aleksandra Galetin – Drug Metabolism and Disposition

**TABLE 2**

Sample preparation and LC-MS/MS conditions used in the selected studies

| Sample preparation              |                                      |                                      | LC-MS/MS analysis     |                                                                                                             |                                     | Study                                                                                                            |
|---------------------------------|--------------------------------------|--------------------------------------|-----------------------|-------------------------------------------------------------------------------------------------------------|-------------------------------------|------------------------------------------------------------------------------------------------------------------|
| Membrane extraction             | Solubilizing/<br>Digestion enhancing | Proteolytic conditions               | Calibration standards | Internal peptide standards                                                                                  | Type of quantification              |                                                                                                                  |
| Extraction kit                  | Deoxycholate                         | Trypsin<br>(20:1,37°C,<br>overnight) | Peptides              | 1B1 (NVTGFFQSFK);<br>1B3 (IYNSVFFGR, NVTGFFQSLK);<br>2B1 (VLAVTDSPAR,<br>SSPAVEQQLLVSGPGK)                  | Absolute                            | (Balogh et al., 2012)<br>(Kimoto et al., 2012)                                                                   |
| Extraction kit                  | Deoxycholate                         | Trypsin<br>(20:1,37°C,<br>overnight) | Peptides              | 1B1 (NVTGFFQSFK);<br>1B3 (NVTGFFQSLK);<br>2B1 (SSPAVEQQLLVSGPGK)                                            | Absolute                            | (Bi et al., 2012)                                                                                                |
| Differential centrifugation     | Guanidine HCl,<br>Urea               | Trypsin<br>(100:1,37°C,16h)          | Peptides              | 1B1(LNTVGIK),<br>1B3(IYNSVFFGR),<br>2B1(VLLQTLR)                                                            | Absolute                            | (Ohtsuki et al., 2012) <sup>a</sup><br>(Schaefer et al., 2012) <sup>a</sup><br>(Kunze et al., 2014) <sup>a</sup> |
| Filter aided preparation (FASP) | SDS                                  | LysC, trypsin<br>(37°C,overnight)    | -                     | NA (Label free method)                                                                                      | Relative to one sample <sup>b</sup> | Karlgren et al., 2012<br>Vildhede et al., 2014                                                                   |
| Extraction kit                  | Rapigest                             | Trypsin<br>(20:1,37°C,16h)           | Purified proteins     | 1B1 (SSIIHIER, NVTGFFQSFK);<br>1B3 (NVTGFFQSLK);<br>2B1 (YYNDLLR,<br>SSPAVEQQLLVSGPGK)                      | Absolute                            | (Ji et al., 2012)                                                                                                |
| Extraction kit                  | -                                    | Trypsin<br>(25:1,37°C,24h)           | Peptides              | 1B1 (NVTGFFQSFK,<br>YVEQQYGQPSSK),<br>1B3 (NVTGFFQSLK, IYNSVFFGR),<br>2B1 (VLAVTDSPAR,<br>SSPAVEQQLLVSGPGK) | Absolute                            | (Prasad et al., 2014)                                                                                            |

<sup>a</sup> Studies based on plasma membrane<sup>b</sup> The reference sample was processed as per Balogh et al., 2012

**DMD # 62034 - Supplemental Data**

**Meta-analysis of expression of hepatic organic anion transporting polypeptide (OATP) transporters in cellular systems relative to human liver tissue**

Justine Badée, Brahim Achour, Amin Rostami-Hodjegan and Aleksandra Galetin – Drug Metabolism and Disposition

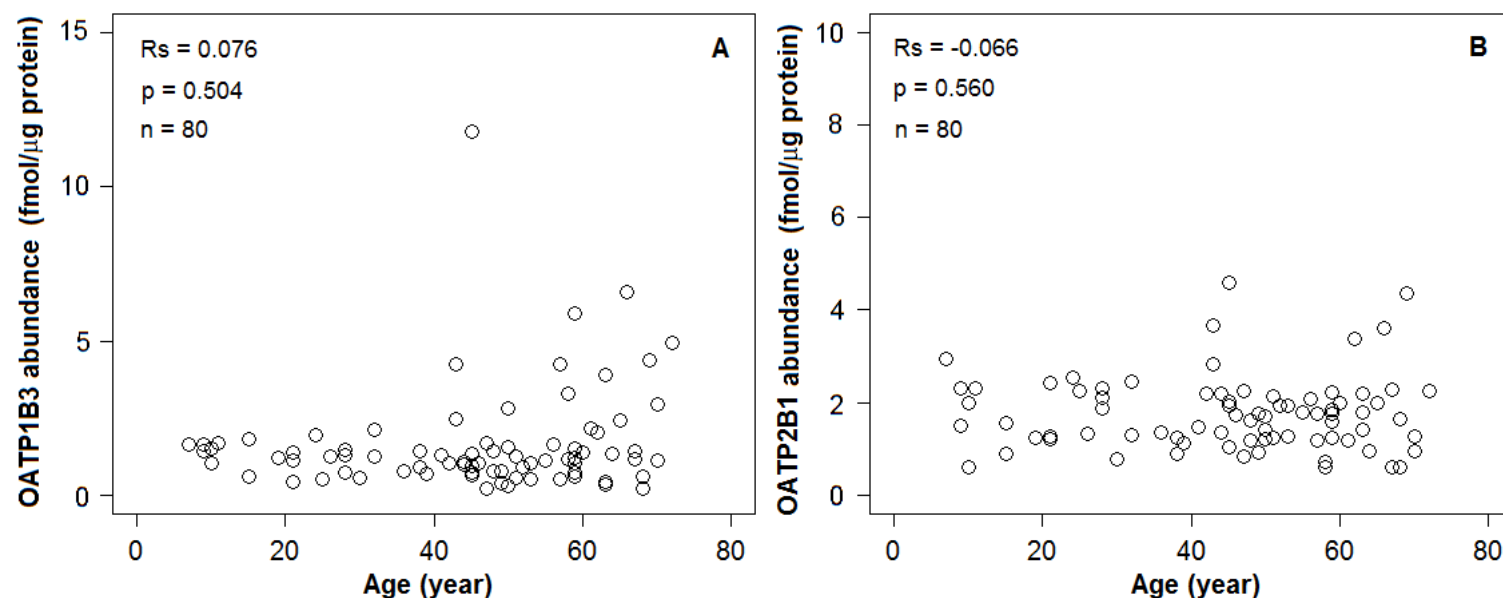

**Figure 1. Age-related differences in hepatic tissue expression levels of OATP transporters.** No significant correlation of OATP1B3 (A) and OATP2B1 (B) transporters expression levels and age of donors was detected (Spearman's rank test,  $R_s < 0.10$ ,  $p > 0.05$ ,  $n = 80$ ).

## **DMD # 62034 - Supplemental Data**

### **Meta-analysis of expression of hepatic organic anion transporting polypeptide (OATP) transporters in cellular systems relative to human liver tissue**

Justine Badée, Brahim Achour, Amin Rostami-Hodjegan and Aleksandra Galetin – Drug Metabolism and Disposition

#### **References**

- Balogh LM, Kimoto E, Chupka J, Zhang H, and Lai Y (2012) Membrane protein quantification by peptide-based mass spectrometry approaches: studies on the organic anion-transporting polypeptide family. *J Proteomics Bioinform* **84**:1-8.
- Bi YA, Kimoto E, Sevidal S, Jones HM, Barton HA, Kempshall S, Whalen KM, Zhang H, Ji C, Fenner KS, El-Kattan AF, and Lai Y (2012) In vitro evaluation of hepatic transporter-mediated clinical drug-drug interactions: hepatocyte model optimization and retrospective investigation. *Drug Metab Dispos* **40**:1085-1092.
- Ji C, Tschantz WR, Pfeifer ND, Ullah M, and Sadagopan N (2012) Development of a multiplex UPLC-MRM MS method for quantification of human membrane transport proteins OATP1B1, OATP1B3 and OATP2B1 in in vitro systems and tissues. *Anal Chim Acta* **717**:67-76.
- Kimoto E, Yoshida K, Balogh LM, Bi YA, Maeda K, El-Kattan A, Sugiyama Y, and Lai Y (2012) Characterization of organic anion transporting polypeptide (OATP) expression and its functional contribution to the uptake of substrates in human hepatocytes. *Mol Pharm* **9**:3535-3542.
- Kunze A, Huwyler J, Camenisch G, and Poller B (2014) Prediction of Organic Anion-Transporting Polypeptide 1B1- and 1B3-Mediated Hepatic Uptake of Statins Based on Transporter Protein Expression and Activity Data. *Drug Metab Dispos* **42**:1514-1521.
- Ohtsuki S, Schaefer O, Kawakami H, Inoue T, Liehner S, Saito A, Ishiguro N, Kishimoto W, Ludwig-Schwellinger E, Ebner T, and Terasaki T (2012) Simultaneous absolute protein quantification of transporters, cytochromes P450, and UDP-glucuronosyltransferases as a novel approach for the characterization of individual human liver: comparison with mRNA levels and activities. *Drug Metab Dispos* **40**:83-92.
- Prasad B, Evers R, Gupta A, Hop CE, Salphati L, Shukla S, Ambudkar SV, and Unadkat JD (2014) Interindividual variability in hepatic organic anion-transporting polypeptides and P-glycoprotein (ABCB1) protein expression: quantification by liquid chromatography tandem mass spectroscopy and influence of genotype, age, and sex. *Drug Metab Dispos* **42**:78-88.

**DMD # 62034 - Supplemental Data**

**Meta-analysis of expression of hepatic organic anion transporting polypeptide (OATP) transporters in cellular systems relative to human liver tissue**

Justine Badée, Brahim Achour, Amin Rostami-Hodjegan and Aleksandra Galetin – Drug Metabolism and Disposition

Schaefer O, Ohtsuki S, Kawakami H, Inoue T, Liehner S, Saito A, Sakamoto A, Ishiguro N,

Matsumaru T, Terasaki T, and Ebner T (2012) Absolute quantification and differential expression of drug transporters, cytochrome P450 enzymes, and UDP-glucuronosyltransferases in cultured primary human hepatocytes. *Drug Metab Dispos* **40**:93-103.
